# Supplementary material for: Effects of moderate intensity endurance training vs. high intensity interval training on weight gain, cardiorespiratory capacity, and metabolic profile in postnatal overfed rats
Source: PubMed Central journal article supplement (PMC6158819; doi:10.1186/s13098-018-0374-x), 2018-09-26

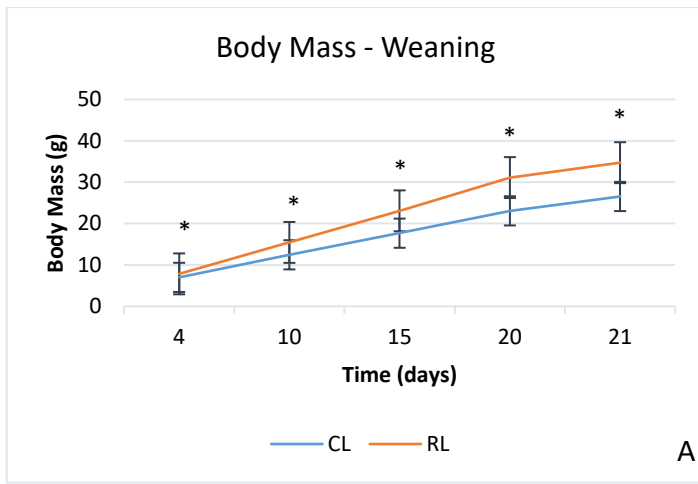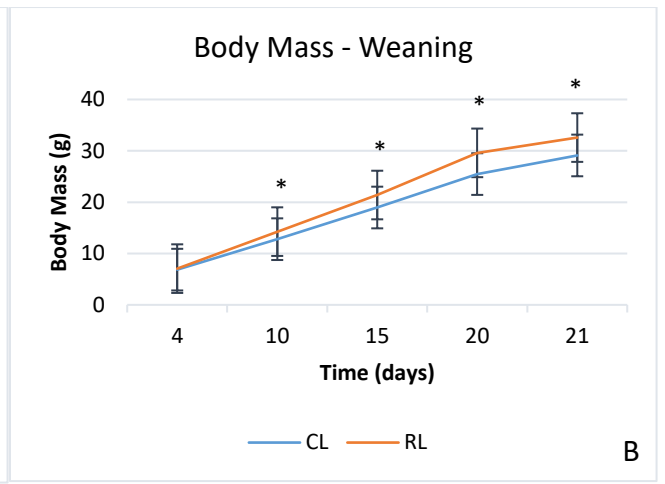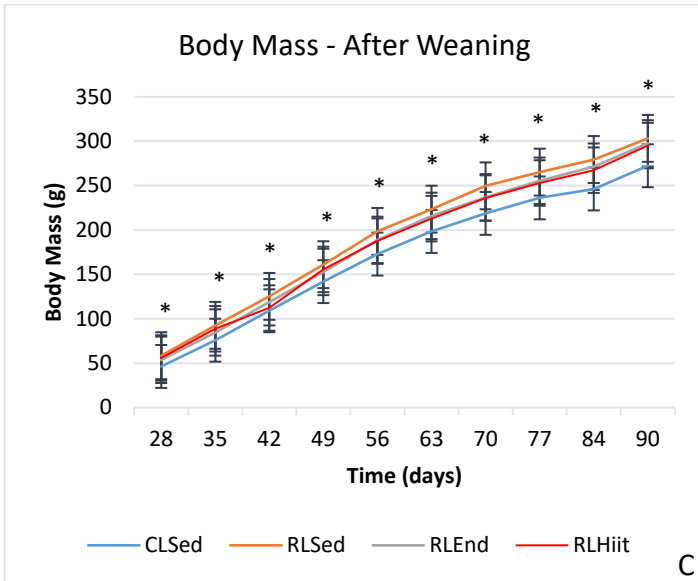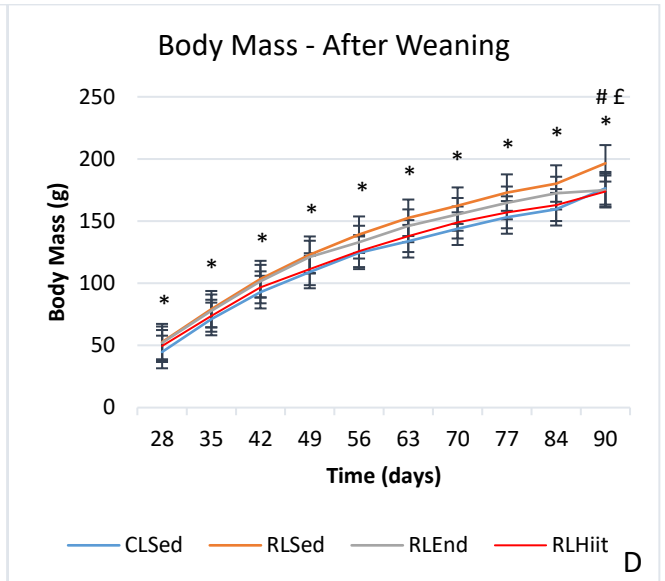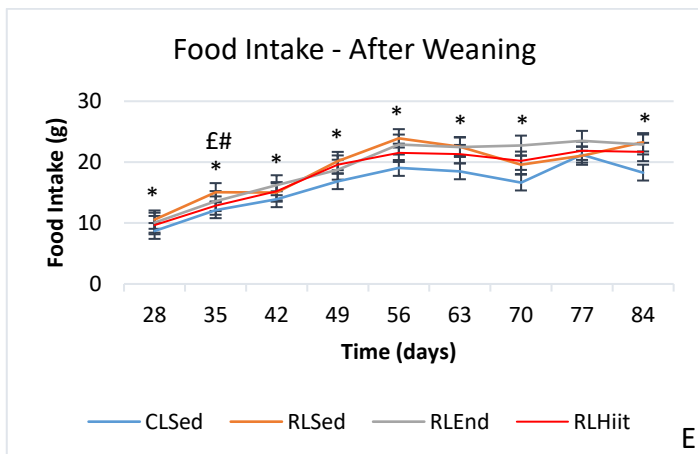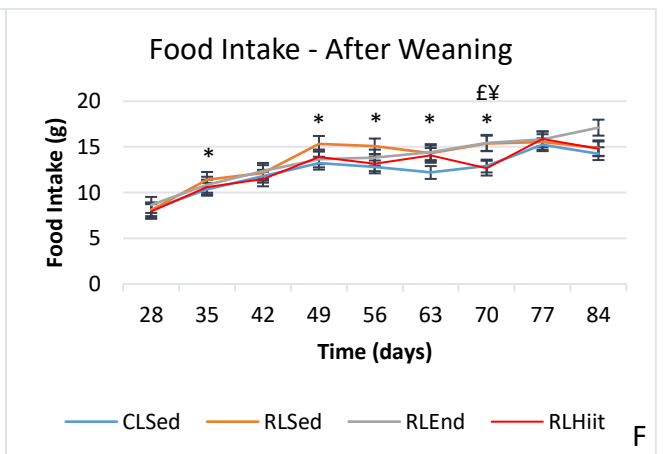

Supplement: 13098_2018_374_MOESM2_ESM.pdf [file 13098_2018_374_MOESM2_ESM.pdf]
